# Supplementary material for: Young age at diagnosis is associated with better prognosis in stage IV breast cancer
Source: publisher site journal article supplement (doi:10.18632/aging.102536), 2019-12-11
Supplement: Supplementary file [file aging-v11i23-102536-supplementary-material-SD1.pdf]

## SUPPLEMENTARY TABLE

Supplementary Table 1. Multivariate analysis of age and breast cancer special survival by competitive risk model.

| Age at diagnosis (years) | No. of patients | Total deaths, No. (%) | Deaths due to this cancer | HR (95%CI) *     |
|--------------------------|-----------------|-----------------------|---------------------------|------------------|
| ≤40                      | 1135            | 544 (47.9)            | 505 (44.5)                | 0.73 (0.67–0.81) |
| 41–50                    | 2030            | 1078 (53.1)           | 1019 (50.2)               | 0.86 (0.80–0.92) |
| 51–60                    | 3464            | 2037 (58.8)           | 1919 (55.4)               | Reference        |
| 61–70                    | 3259            | 1989 (61.0)           | 1814 (55.7)               | 1.04 (0.98–1.11) |
| >70                      | 3181            | 2252 (70.8)           | 1962 (62.70)              | 1.19 (1.11–1.28) |
